# Supplementary material for: Drought disrupts atmospheric carbon uptake in a Mediterranean saline lake
Source: Copernicus journal article supplement (doi:10.5194/egusphere-2024-1562), 2024-06-25
Supplement: Supplementary file 1 [file egusphere-2024-1562-supplement.pdf]

Supporting Information for:

**Drought disrupts atmospheric carbon sequestration in a  
Mediterranean saline lake**

Ihab Alfadhel, Ignacio Peralta-Maraver, Isabel Reche, Enrique P. Sánchez-Cañete, Sergio Aranda-Barranco, Eva Rodríguez-Velasco, Andrew S. Kowalski, Penélope Serrano-Ortiz.

**Table of contents**

Figure S1 – p.1

Figure S2 – p.2

Figure S3 – p.2

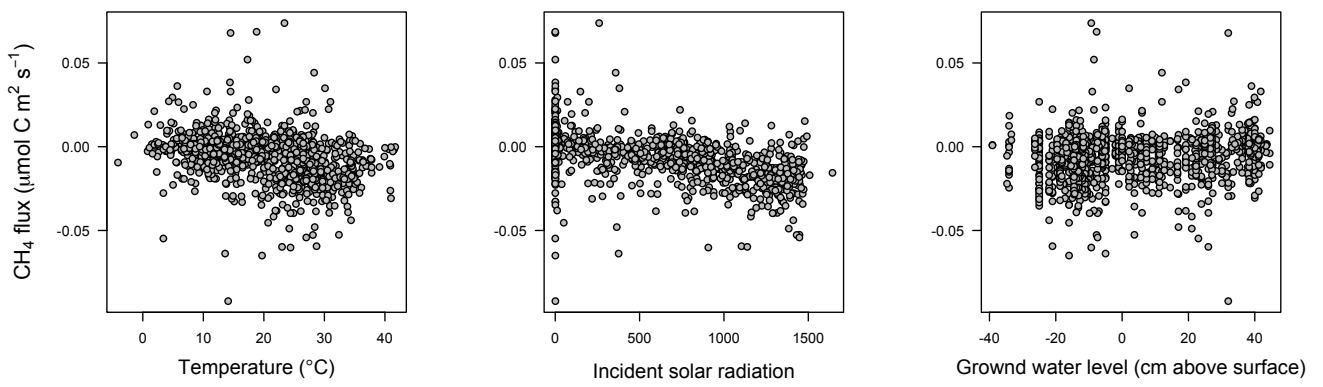

**Figure S1.** Observed vs predicted values of CO<sub>2</sub> flux obtained from our retrospective prediction model considering the study period.

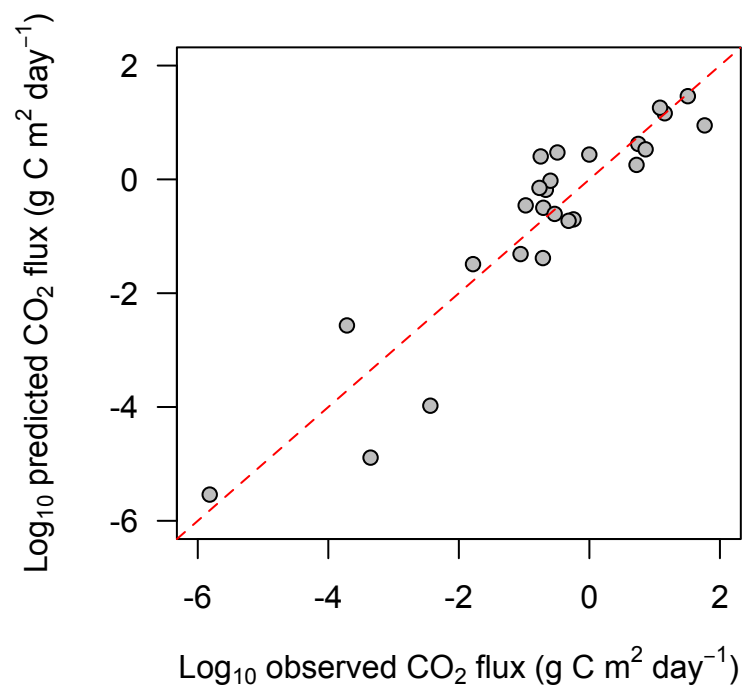

**Figure S2.** Observed vs predicted values of CO<sub>2</sub> flux obtained from our retrospective prediction model considering the study period.

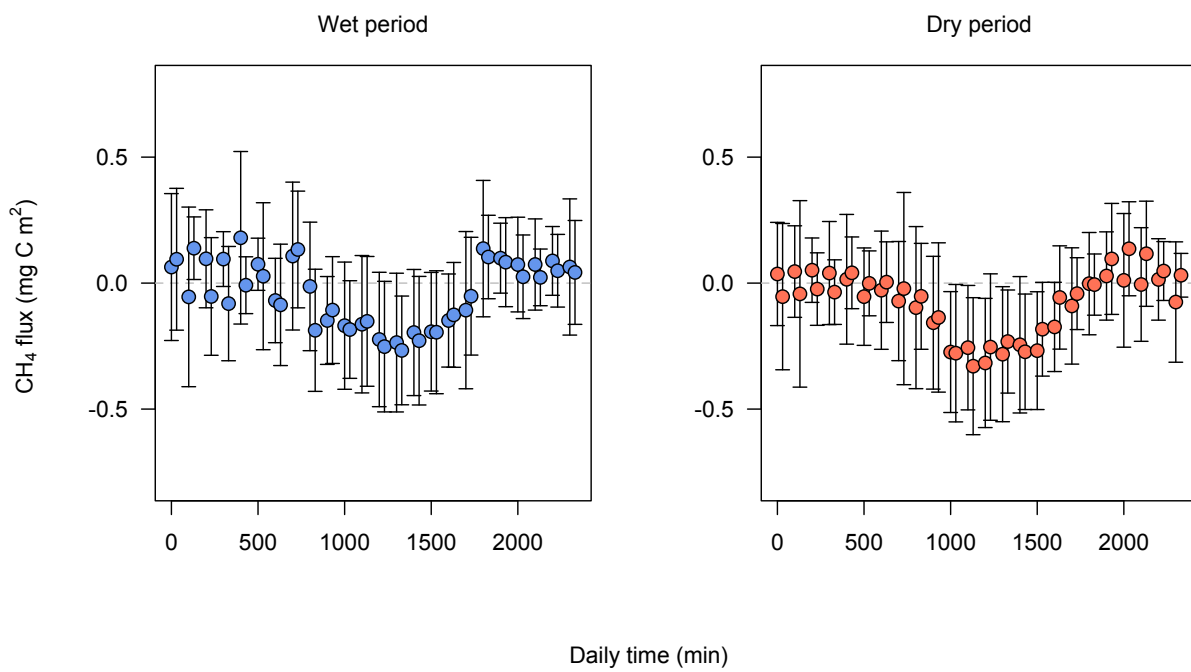

**Figure S3.** Integrated values distribution of CH<sub>4</sub> flux on a daily scale during the wet and dry periods.
